# Supplementary material
Source: Springer Nature journal article supplement (https://www.springermedizin.de/resource/supplementary/13058_2010_9525_MOESM6_ESM.pdf/9702292)

Ligand-dependent effects of 2C4 (2 ug/mL) and erlotinib (1uM) on SKOV3 in FFPE VeraTag assays

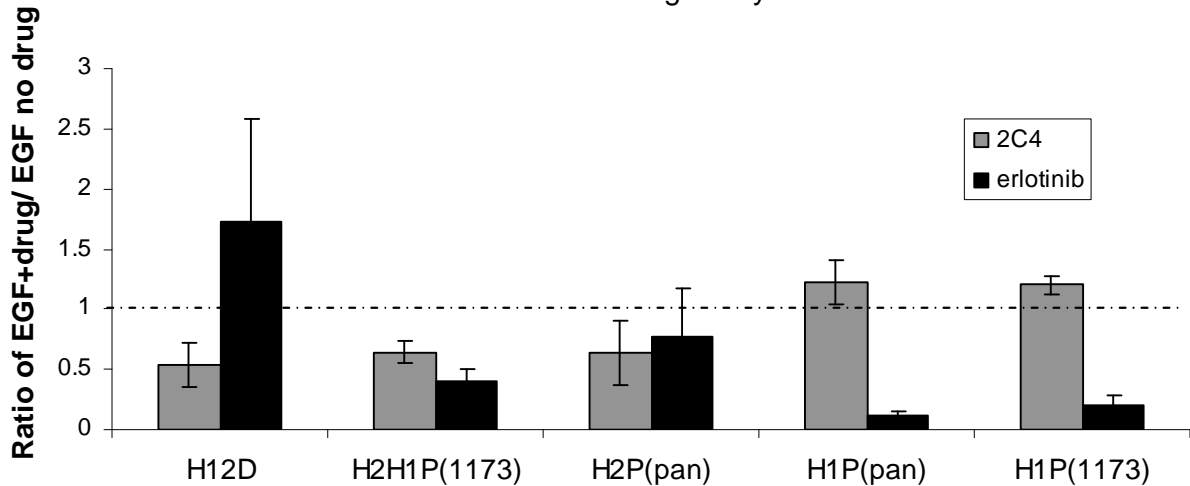

Supplement: MOESM6 [file 9702292]
